# Supplementary material for: Transcriptomic Analysis Reveals the Impact of the Biopesticide Metarhizium anisopliae on the Immune System of Major Workers in Solenopsis invicta
Source: MDPI journal article supplement (doi:10.3390/insects14080701), 2023-08-11
Supplement: s1 [file Table S1 RT-qPCR primers used in this study.xlsx]

## Sheet: Sheet1
Table S1. RT-qPCR primers used in this study.
Gene number	Primer name	Primer sequences（5’-----3’）
LOC105194757	GNBP1-F	GCGATTGGCTGTATCCTGAGAT
	GNBP1-R	GTAGCGTTCACCAGGTTGTCAT
LOC105200397	GNBP3-F	AGTGGGCAACGAAGAGCTAC
	GNBP3-R	TGGAAATCGTCCGACCAAGG
LOC105196159	PGRP SC2-F	GTCCAGGAGACTACTGCCAACT
	PGRP SC2-R	TTCCGTCTTCGCCGACTAGG
LOC105195705	Relish-F	TCGCATGATAGGCAGGAAGAGA
	Relish-R	ACGGAACTCACTAGACGGACAT
LOC105200920	ModSP1-F	TTCGCTGCCTACCAGAATGTG
	ModSP1-R	CCGCTGATACCACGAGATTGTT
LOC105202230	Toll3-F	TTGGAGCTACGAACAACACCTT
	Toll3-R	CGATAGACTTGAACCGTCCTGA
LOC105196059	IMD-F	AACGACACCCACCGATTTCTG
	IMD-R	CGAGCCGATCTTCACTCCATTG
LOC105201775	Cactus-F	GATACGACTGGTGCCTCATCC
	Cactus-R	TCTGACGATTAGCGACTGACTC
LOC105198518	RPL18F	TTTACGGCTCCTCGTCAAGC
	RPL18R	ACGCAATTCTCCCTTCCAGG
