# Supplementary material for: Transcriptomic Analysis Reveals the Impact of the Biopesticide Metarhizium anisopliae on the Immune System of Major Workers in Solenopsis invicta
Source: MDPI journal article supplement (doi:10.3390/insects14080701), 2023-08-11
Supplement: s1 [file Table S2 Data Filtering and Base Information Statistics Table.xlsx]

## Sheet: Sheet1
Table S2 Data Filtering and Base Information Statistics Table
Sample	RawData(bp)	CleanData(bp)	Q30(%)	GC(%)	Unique_Mapped(%)	Multiple_Mapped(%)	Total_Mapped(%)
0h_1	12023125200	11973421620	11199838338 (93.54%)	5023516261 (41.96%)	64004358 (81.59%)	1726491 (2.20%)	65730849 (83.79%)
0h_2	12585789600	12523045608	11755293150 (93.87%)	5677381210 (45.34%)	38172849 (46.02%)	1109690 (1.34%)	39282539 (47.36%)
0h_3	12295540800	12202221322	11368748152 (93.17%)	5125967587 (42.01%)	69881776 (87.38%)	2031749 (2.54%)	71913525 (89.92%)
6h_1	12559729200	12494216347	11650698303 (93.25%)	5220884379 (41.79%)	70437618 (85.74%)	1898661 (2.31%)	72336279 (88.05%)
6h_2	12542858700	12437889902	11644622860 (93.62%)	5369734892 (43.17%)	71095613 (91.31%)	1868896 (2.40%)	72964509 (93.72%)
6h_3	11970258900	11885606145	11172734713 (94.00%)	5048988825 (42.48%)	69329652 (90.98%)	1891923 (2.48%)	71221575 (93.47%)
24h_1	12744129000	12668700169	11773227804 (92.93%)	5361944079 (42.32%)	62739290 (75.61%)	1892799 (2.28%)	64632089 (77.89%)
24h_2	12388944000	12322634203	11652996032 (94.57%)	5186530975 (42.09%)	72219496 (91.73%)	1915075 (2.43%)	74134571 (94.16%)
24h_3	14642501400	14541794430	13395630677 (92.12%)	6252963056 (43.00%)	84074016 (91.70%)	2200560 (2.40%)	86274576 (94.10%)
48h_1	12247948800	12125113481	11317832657 (93.34%)	5260633719 (43.39%)	48211617 (60.52%)	3434064 (4.31%)	51645681 (64.83%)
48h_2	13870504500	13773296457	12613691175 (91.58%)	5888034427 (42.75%)	79613775 (90.41%)	2136074 (2.43%)	81749849 (92.84%)
48h_3	12058673700	11965774642	11122127453 (92.95%)	5277722459 (44.11%)	68730970 (89.95%)	1612110 (2.11%)	70343080 (92.06%)
