# Supplementary material for: Transcriptomic Analysis Reveals the Impact of the Biopesticide Metarhizium anisopliae on the Immune System of Major Workers in Solenopsis invicta
Source: MDPI journal article supplement (doi:10.3390/insects14080701), 2023-08-11
Supplement: s1 [file Table S3 immune-related genes.xlsx]

## Sheet: Sheet1
Table S3. Immune-related genes from S. invicta
Gene id	Gene name	Average FPKM value at each group				NR annotation	KEGG annotation	STEM	WGCNA	log2 Ratio
		0h	6h	24h	48h					0h/6h	0h/24h	0h/48h	6h/24h	24h/48h
Recognition
LOC105194757	GNBP1	181.001	89.7773	80.17	418.213	beta-1,3-glucan-binding protein [Solenopsis invicta]	K20697:gram-negative bacteria-binding protein 1	profile2	darkorange		-1.1679	1.2197		2.3876
LOC105200397	GNBP3	408.056	245.253	241.178	177.788	beta-1,3-glucan-binding protein [Solenopsis invicta]	K20692:gram-negative bacteria-binding protein 3	profile0	other			-1.1879
LOC105203375	PGRP-SA1	0.666909	0.505669	0.310763	1.09541	peptidoglycan-recognition protein 1-like [Solenopsis invicta]	K01446:peptidoglycan recognition protein	profile2	darkorange		-1.1001			1.8238
LOC120356878	PGRP-SA2	0.515906	0.631131	0.347471	1.40973	peptidoglycan-recognition protein 1-like [Solenopsis invicta]	K01446:peptidoglycan recognition protein	other	darkorange			1.4561		2.023
LOC105196159	PGRP-SC2	147.82	72.4664	73.8009	107.787	peptidoglycan-recognition protein SC2	K01446:peptidoglycan recognition protein	profile2	other	-1.028
LOC105200975	SCARB1	22.9107	21.6155	17.3575	35.2022	scavenger receptor class B member 1 isoform X1 [Solenopsis invicta]	K13885:scavenger receptor class B, member 1	profile2	darkorange					1.0239
signal transduction
LOC105202230	Toll3	2.56274	2.34417	3.21315	13.3816	toll-like receptor 3 [Solenopsis invicta]	-	profile11	darkorange			2.3934		2.0616
LOC105201775	Cactus	9.71258	12.0705	11.0118	20.1726	NF-kappa-B inhibitor cactus-like [Solenopsis invicta]	K04734:NF-kappa-B inhibitor alpha	profile11	darkorange			1.065
LOC105196059	IMD	24.0296	19.8904	23.6519	54.7495	protein immune deficiency isoform X1 [Monomorium pharaonis]	K20699:immune deficiency	profile11	darkorange			1.1987		1.2147
LOC105195705	Relish	88.3539	45.2763	37.4466	84.2118	nuclear factor NF-kappa-B p110 subunit [Solenopsis invicta]	K02580:nuclear factor NF-kappa-B p105 subunit	profile2	other		-1.2316			1.1735
LOC105201790	Ankyrin	4.66502	8.82316	9.63532	7.89727	ankyrin-2 isoform X1 [Solenopsis invicta]	K10380:ankyrin	profile10	darkorange		1.0523
LOC105199833	ModSP1	137.118	76.6635	80.126	163.748	modular serine protease-like [Solenopsis invicta]	K20674:modular serine protease	profile2	darkorange					1.0355
LOC105200920	ModSP2	310.542	175.885	171.96	423.321	modular serine protease-like [Solenopsis invicta]	K20674:modular serine protease	profile2	darkorange					1.304
Modulation
LOC120356822	Serine protease1	3.63736	3.20328	2.59324	6.20181	serine protease 53-like [Solenopsis invicta]	-	profile2	ivory					1.262
LOC105200778	Serine protease2	6.04299	2.42637	2.74303	2.10727	trypsin-1 [Solenopsis invicta]	K01312:trypsin	profile1	black	-1.3109	-1.1325	-1.5091
LOC113003006	Serine protease3	0.248462	0.35478	0.405224	1.11917	trypsin-1-like [Solenopsis invicta]	K01312:trypsin	profile11	other			2.1737		1.4786
LOC105200933	Serine protease4	1.43204	0.284029	0.318234	0.295459	trypsin-2 [Solenopsis invicta]	K01312:trypsin	profile1	black	-2.3219	-2.1729	-2.2642
LOC105194637	Serine protease5	3.9614	0.930341	3.18325	3.30889	chymotrypsin-1-like [Solenopsis invicta]	K01312:trypsin	other	other	-2.0858			1.7758
LOC120356743	Serine protease6	245.977	109.104	128.316	107.465	chymotrypsin-2-like isoform X1 [Solenopsis invicta]	K01312:trypsin	profile1	black	-1.1675		-1.1842
LOC105193613	Serine protease7	143.821	88.4647	97.935	69.1811	chymotrypsin-2-like isoform X1 [Solenopsis invicta]	K01312:trypsin	profile0	black			-1.0455
LOC105202725	Serpin1	19.3217	35.7579	33.0539	40.1537	serine protease inhibitor dipetalogastin [Solenopsis invicta]	-	profile11	black			1.0653
LOC105199370	Serpin2	29.5141	24.2744	21.5784	59.1995	serine protease inhibitor 28Dc [Monomorium pharaonis]	-	profile2	darkorange			1.0148		1.46
LOC105199560	Serpin3	154.824	116.371	77.7404	278.984	serine protease inhibitor 88Ea isoform X1 [Solenopsis invicta]	-	profile2	darkorange					1.8478
LOC105193420	Serpin4	0.308543	0.874294	0.657782	0.932704	serpin B3-like [Solenopsis invicta]	-	other	other	1.5103	1.1016	1.6082
LOC105197777	PPO1	44.7492	33.7306	41.1245	18.4196	phenoloxidase 1 [Solenopsis invicta]	-	other	darkorange			-1.2702		-1.1548
LOC105195851	PPAF2	560.977	202.576	177.39	320.679	phenoloxidase-activating factor 2 isoform X1 [Solenopsis invicta]	-	profile2	other	-1.4637	-1.654
effectors
LOC105196795	Hymenoptaecin1	562.399	104.166	97.8313	419.897	hymenoptaecin [Camponotus floridanus]	-	profile2	other	-2.4268	-2.517
LOC105196875	Hymenoptaecin2	211.096	43.3757	32.104	167.324	hymenoptaecin-like [Temnothorax curvispinosus]	-	profile2	other	-2.2772	-2.7112			2.3873
LOC105198088	lysozyme1	29.2304	15.0429	20.613	5.34037	lysozyme 2-like [Solenopsis invicta]	-	other	black			-2.4409		-1.9441
LOC105199375	lysozyme2	184.915	107.029	135.357	83.5479	lysozyme [Solenopsis invicta]	-	profile3	ivory			-1.1365
LOC105201192	lysozyme3	198.976	187.267	221.724	104.352	lysozyme isoform X1 [Solenopsis invicta]	-	other	sienna3					-1.0832
others
LOC105197218	Peroxidase	1.14652	0.643673	0.920398	0.488089	peroxidase-like [Solenopsis invicta]	-	other	ivory			-1.2228
LOC105205103	Disintegrin	3.11781	4.55635	4.83743	6.36896	A disintegrin and metalloproteinase with thrombospondin motifs 9 isoform X1 [Solenopsis invicta]	-	profile11	other			1.0403
