# Supplementary material for: Transcriptomic Analysis Reveals the Impact of the Biopesticide Metarhizium anisopliae on the Immune System of Major Workers in Solenopsis invicta
Source: MDPI journal article supplement (doi:10.3390/insects14080701), 2023-08-11
Supplement: s1 [file Table S4 The gene information annotated in Toll and Imd signaling pathway.xlsx]

## Sheet: Sheet1
Table S4 The gene information annotated in Toll and Imd signaling pathway
Gene id	Gene name	source	0h_FPKM_Average	6h_FPKM_Average	24h_FPKM_Average	48h_FPKM_Average
LOC105203375	PGRP-SA1	Significant WGCNA model darkorange, DEGs	0.666909	0.505669	0.310763	1.09541
LOC120356878	PGRP-SA2	Significant WGCNA model darkorange, DEGs	0.515906	0.631131	0.347471	1.40973
LOC105194757	GNBP1	Significant WGCNA model darkorange, DEGs	181.001	89.7773	80.17	418.213
LOC105200397	GNBP3	DEGs	408.056	245.253	241.178	177.788
LOC105199833	ModSP1	Significant WGCNA model darkorange, DEGs	137.118	76.6635	80.126	163.748
LOC105200920	ModSP2	Significant WGCNA model darkorange, DEGs	310.542	175.885	171.96	423.321
LOC105194156	Spaetzle1	Significant WGCNA model darkorange, DEGs	19.0625	16.0134	18.7111	23.9504
LOC105207756	Spaetzle2	Significant WGCNA model darkorange, DEGs	63.8527	57.6791	61.4107	78.8464
LOC105202230	Toll3	Significant WGCNA model darkorange, DEGs	2.56274	2.34417	3.21315	13.3816
LOC105201138	MyD88	Significant WGCNA model black	13.2076	9.56492	8.08565	9.01709
LOC105198406	Pelle	Significant WGCNA model black	12.3145	9.04452	10.2574	9.75588
LOC105197305	Tube	Significant WGCNA model black	31.1248	20.4054	21.9109	19.2941
LOC105205802	Dorsal	Significant WGCNA model black	13.0065	17.0122	17.3764	21.6496
LOC105201775	Cactus	Significant WGCNA model darkorange, DEGs	9.71258	12.0705	11.0118	20.1726
LOC105198932	Defensin2	Significant WGCNA model black	121.953	70.4555	80.4186	61.2053
LOC105196159	PGRP-SC2	DEGs	147.82	72.4664	73.8009	107.787
LOC105193431	PGRP-LC	Significant WGCNA model darkorange	10.0366	9.64885	10.3461	14.0022
LOC105196059	IMD	Significant WGCNA model darkorange, DEGs	24.0296	19.8904	23.6519	54.7495
LOC105197895	Ird5	Significant WGCNA model darkorange	14.6533	11.7568	12.915	17.6394
LOC105195705	Relish	DEGs	88.3539	45.2763	37.4466	84.2118
LOC105201790	Ankyrin	Significant WGCNA model darkorange, DEGs	4.66502	8.82316	9.63532	7.89727
LOC105196795	Hymenoptaecin1	DEGs	562.399	104.166	97.8313	419.897
LOC105196875	Hymenoptaecin2	DEGs	211.096	43.3757	32.104	167.324
